# Supplementary material for: Machine Learning for Paper Grammage Prediction Based on Sensor Measurements in Paper Mills
Source: Preprints.org preprint supplement (doi:10.20944/preprints201912.0051.v1), 2019-12-04
Supplement: Supplementary file 1 [file supplementary]

Diameter(mm)	Width(mm)	Weight(kg)	Grammage(g/m^2)
1000	1000	718	68
1000	820	592	70
1000	820	592	70
1000	820	592	70
1000	820	592	70
1000	820	588	70
1000	820	592	70
1000	1000	722	68
1000	820	595	70
1000	820	594	70
1000	820	595	70
1000	820	594	70
1000	820	556	70
1000	820	555	70
1000	1000	672	68
1000	820	555	70
1000	820	553	70
1000	820	555	70
1000	820	555	70
1000	820	593	70
1000	820	594	70
1000	1000	734	68
1000	820	605	70
1000	820	605	70
1000	820	605	70
1000	820	605	70
1000	820	605	70
1000	820	604	70
1000	1000	744	68
1000	820	613	70
1000	820	612	70
1000	820	612	70
1000	820	612	70
1000	820	606	70
1000	820	606	70
1000	1000	734	68
1000	820	605	70
1000	820	605	70
1000	820	605	70
1000	820	605	70
1000	820	523	70
1000	820	521	70
1000	1000	633	68
1000	820	523	70
1000	820	522	70
1000	820	522	70
1000	820	522	70
1000	820	612	70
1000	820	612	70
1000	1000	735	68
1000	820	603	70
1000	820	605	70
1000	820	606	70
1000	820	605	70
1000	820	605	70
1000	820	605	70
1000	1000	734	68
1000	820	605	70
1000	820	605	70
1000	820	605	70
1000	820	605	70
1000	820	605	70
1000	820	605	70
1000	1000	737	68
1000	820	608	70
1000	820	608	70
1000	820	608	70
1000	820	608	70
1000	820	608	70
1000	820	607	70
1000	1000	662	68
1000	820	545	70
1000	820	545	70
1000	820	545	70
1000	820	545	70
1000	820	545	70
1000	820	545	70
1000	1000	729	68
1000	820	601	70
1000	820	598	70
1000	810	598	70
1000	820	598	70
1000	820	594	70
1000	820	598	70
1000	1000	730	70
1000	1000	730	68
1000	820	600	70
1000	820	601	70
1000	820	601	70
1000	820	600	70
1000	820	599	70
1000	820	599	70
1000	1000	727	68
1000	820	598	70
1000	820	599	70
1000	820	599	70
1000	820	599	70
1000	820	590	70
1000	820	599	70
1000	1000	721	68
1000	810	594	70
1000	820	594	70
1000	820	594	70
1000	820	542	70
1000	820	595	70
1000	820	543	70
1000	820	594	70
1000	1000	659	68
1000	820	543	70
1000	820	603	70
1000	820	603	70
1000	820	543	70
1000	820	542	70
1000	820	542	70
1000	1000	712	68
1000	820	587	70
1000	820	587	70
1000	820	587	70
1000	820	587	70
1000	820	587	70
1000	820	602	70
1000	1000	715	68
1000	820	588	70
1000	820	589	70
1000	820	588	70
1000	820	588	70
1000	820	589	70
1000	820	589	70
1000	820	601	70
1000	820	604	70
1000	810	605	70
1000	820	603	70
1000	820	602	70
1000	820	601	70
1000	1000	731	68
1000	1000	716	68
1000	820	589	70
1000	820	589	70
1000	820	589	70
1000	820	589	70
1000	820	589	70
1000	820	589	70
1000	1000	719	68
1000	820	591	70
1000	820	592	70
1000	820	591	70
1000	820	590	70
1000	820	590	70
1000	820	591	70
1000	1000	734	68
1000	820	604	70
1000	820	601	70
1000	820	594	70
1000	820	587	70
1000	820	595	70
1000	820	604	70
1000	1000	712	68
1000	1000	712	68
1000	820	587	70
1000	820	587	70
1000	820	587	70
1000	820	587	70
1000	820	587	70
1000	820	583	70
1000	1000	716	68
1000	820	589	70
1000	820	589	70
1000	820	590	70
1000	820	588	70
1000	820	589	70
1000	820	590	70
1000	1000	724	68
1000	820	596	70
1000	820	596	70
1000	820	596	70
1000	820	596	70
1000	820	596	70
1000	820	596	70
1000	1000	716	68
1000	820	600	70
1000	820	600	70
1000	820	600	70
1000	820	600	70
1000	820	600	70
1000	820	548	70
1000	810	544	70
1000	1000	681	68
1000	820	563	70
1000	820	563	70
1000	820	562	70
1000	820	560	70
1000	820	561	70
1000	820	562	70
1000	1000	680	68
1000	1000	680	68
1000	820	562	70
1000	820	562	70
1000	820	562	70
1000	820	563	70
1000	820	563	70
1000	820	563	70
1000	820	563	70
1000	820	548	70
1000	820	547	70
1000	820	547	70
1000	820	545	70
1000	820	547	70
1000	1000	663	68
1000	1000	679	68
1000	820	567	70
1000	820	572	70
1000	820	573	70
1000	820	574	70
1000	820	557	70
1000	1000	744	68
1000	820	616	70
1000	820	619	70
1000	820	617	70
1000	820	617	70
1000	820	615	70
1000	820	616	70
1000	1000	721	68
1000	1000	721	68
1000	820	595	70
1000	820	595	70
1000	820	593	70
1000	820	594	70
1000	820	593	70
1000	820	594	70
1000	1000	723	68
1000	820	596	70
1000	820	597	70
1000	820	596	70
1000	820	595	70
1000	820	595	70
1000	820	589	70
1000	1000	722	68
1000	820	596	70
1000	820	596	70
1000	820	596	70
1000	820	595	70
1000	820	596	70
1000	820	594	70
1000	1000	721	68
1000	820	595	70
1000	820	596	70
1000	820	596	70
1000	820	595	70
1000	820	596	70
1000	820	596	70
1000	1000	676	68
1000	820	558	70
1000	820	557	70
1000	820	557	70
1000	820	557	70
1000	820	556	70
1000	820	557	70
1000	820	567	70
1000	820	567	70
1000	820	567	70
1000	820	567	70
1000	820	569	70
1000	820	567	70
1000	1000	690	68
1000	1000	852	70
1000	1000	693	68
1000	820	573	70
1000	820	570	70
1000	820	570	70
1000	820	570	70
1000	820	572	70
1000	820	572	70
1000	1000	696	68
1000	820	571	70
1000	820	570	70
1000	820	570	70
1000	820	569	70
1000	820	571	70
1000	820	573	70
1000	1000	727	68
1000	820	597	70
1000	820	594	70
1000	820	594	70
1000	820	594	70
1000	820	595	70
1000	820	597	70
1000	1000	725	70
1000	1000	725	68
1000	820	596	70
1000	820	594	70
1000	820	594	70
1000	820	593	70
1000	820	593	70
1000	820	594	70
1000	1000	711	68
1000	820	586	70
1000	820	583	70
1000	820	583	70
1000	820	581	70
1000	820	584	70
1000	820	584	70
1000	1000	664	68
1000	1000	664	68
1000	820	550	70
1000	820	549	70
1000	820	549	70
1000	820	549	70
1000	820	547	70
1000	820	550	70
1000	820	551	70
1000	820	549	70
1000	1000	745	68
1000	1000	745	68
1000	820	617	70
1000	820	617	70
1000	820	617	70
1000	820	617	70
1000	820	617	70
1000	820	619	70
1000	820	619	70
1000	1000	720	68
1000	820	595	70
1000	820	595	70
1000	820	596	70
1000	820	597	70
1000	820	598	70
1000	820	596	70
1000	1000	713	68
1000	820	589	68
1000	1000	589	68
1000	820	589	70
1000	1000	713	68
1000	820	589	70
1000	820	592	70
1000	820	589	70
1000	820	590	70
1000	820	591	70
1000	820	591	70
1000	1000	653	68
1000	820	540	70
1000	820	541	70
1000	820	542	70
1000	820	541	70
1000	820	540	70
1000	810	541	70
1000	1000	663	68
1000	820	547	70
1000	1000	663	70
1000	1000	663	70
1000	820	547	70
1000	820	548	70
1000	1000	548	68
1000	820	547	70
1000	820	548	70
900	1000	507	70
900	820	420	70
900	820	418	70
900	820	418	70
900	820	417	70
900	820	417	70
900	820	414	70
900	1000	571	70
900	820	471	70
900	820	471	70
900	820	471	70
900	820	471	70
900	820	469	70
900	820	473	70
1000	1000	727	68
1000	820	598	70
1000	820	600	70
1000	820	601	70
1000	820	600	70
1000	820	600	70
1000	820	601	70
1000	1000	725	68
1000	820	600	70
1000	820	600	70
1000	820	601	70
1000	820	601	70
1000	820	601	70
1000	820	601	70
1000	1000	717	68
1000	820	591	70
1000	820	591	70
1000	820	592	70
1000	820	591	70
1000	820	592	70
1000	820	592	70
1000	1000	716	68
1000	820	590	70
1000	820	591	70
1000	820	592	70
1000	820	591	70
1000	820	592	70
1000	820	592	70
1000	1000	653	68
1000	820	540	70
1000	820	542	70
1000	820	540	70
1000	820	540	70
1000	820	541	70
1000	820	541	70
1000	1000	742	68
1000	820	613	70
1000	820	614	70
1000	820	612	70
1000	820	612	70
1000	820	613	70
1000	820	613	70
1000	1000	743	68
1000	820	611	70
1000	820	612	70
1000	820	610	70
1000	820	611	70
1000	820	611	70
1000	820	612	70
1000	1000	743	68
1000	820	612	70
1000	820	612	70
1000	820	612	70
1000	820	612	70
1000	820	612	70
1000	820	610	70
1000	1000	726	68
1000	820	599	70
1000	820	599	70
1000	820	599	70
1000	820	597	70
1000	820	596	70
1000	820	585	70
1000	1000	726	68
1000	820	601	70
1000	820	600	70
1000	820	601	70
1000	820	599	70
1000	820	600	70
1000	820	600	70
1000	1000	725	68
1000	820	599	70
1000	820	597	70
1000	820	599	70
1000	820	598	70
1000	820	598	70
1000	820	598	70
1000	1000	739	68
1000	820	611	70
1000	820	611	70
1000	820	611	70
1000	820	610	70
1000	820	611	70
1000	820	612	70
1000	1000	744	68
1000	820	614	70
1000	820	612	70
1000	820	614	70
1000	820	612	70
1000	840	612	70
1000	820	612	70
1000	1000	743	68
1000	820	614	70
1000	820	614	70
1000	820	615	70
1000	820	615	70
1000	820	614	70
1000	820	613	70
1000	1000	755	68
1000	820	623	70
1000	820	623	70
1000	820	623	70
1000	820	621	70
1000	820	621	70
1000	820	612	70
1000	1000	739	70
1000	820	609	70
1000	820	609	70
1000	820	609	70
1000	820	609	70
1000	820	609	70
1000	820	608	70
1000	820	622	70
1000	820	623	70
1000	820	621	70
1000	820	623	70
1000	820	623	70
1000	820	623	70
1000	1000	752	70
1000	1000	765	70
1000	820	629	70
1000	820	628	70
1000	820	628	70
1000	820	627	70
1000	820	631	70
1000	820	626	70
1000	1000	736	70
1000	820	607	70
1000	820	608	70
1000	820	608	70
1000	820	607	70
1000	820	608	70
1000	820	607	70
1000	1000	741	70
1000	820	612	70
1000	820	612	70
1000	820	612	70
1000	820	612	70
1000	820	612	70
1000	820	612	70
1000	1000	716	70
1000	820	592	70
1000	820	591	70
1000	820	592	70
1000	820	590	70
1000	820	591	70
1000	820	591	70
1000	1000	736	68
1000	820	608	70
1000	820	607	70
1000	820	606	70
1000	820	606	70
1000	820	607	70
1000	820	607	70
1000	1000	741	68
1000	820	611	70
1000	820	611	70
1000	820	610	70
1000	820	610	70
1000	820	611	70
1000	820	611	70
1000	820	564	70
1000	820	565	70
1000	820	565	70
1000	820	566	70
1000	820	565	70
1000	820	555	70
1000	1000	682	70
1000	1000	700	68
1000	1000	700	68
1000	820	580	70
1000	820	578	70
1000	820	579	70
1000	820	578	70
1000	820	578	70
1000	820	578	70
1000	1000	723	68
1000	820	597	70
1000	820	596	70
1000	820	597	70
1000	820	596	70
1000	820	597	70
1000	820	596	70
1000	1000	678	70
1000	1000	678	68
1000	1000	678	68
1000	820	560	70
1000	820	559	70
1000	820	559	70
1000	820	558	70
1000	820	558	70
1000	820	556	70
1000	820	548	70
1000	810	544	70
1000	1000	681	68
1000	820	563	70
1000	820	563	70
1000	820	562	70
1000	820	560	70
1000	820	561	70
1000	820	562	70
1000	1000	680	68
1000	1000	680	68
1000	820	562	70
1000	820	562	70
1000	820	562	70
1000	820	563	70
1000	820	563	70
1000	820	563	70
1000	820	563	70
1000	820	548	70
1000	820	547	70
1000	820	547	70
1000	820	545	70
1000	820	547	70
1000	1000	663	68
1000	1000	679	68
1000	820	567	70
1000	820	572	70
1000	820	573	70
1000	820	574	70
1000	820	557	70
1000	1000	744	68
1000	820	616	70
1000	820	619	70
1000	820	617	70
1000	820	617	70
1000	820	615	70
1000	820	616	70
1000	1000	721	68
1000	1000	721	68
1000	820	595	70
1000	820	595	70
1000	820	593	70
1000	820	594	70
1000	820	593	70
1000	820	594	70
1000	1000	723	68
1000	820	596	70
1000	820	597	70
1000	820	596	70
1000	820	595	70
1000	820	595	70
1000	820	589	70
1000	1000	722	68
1000	820	596	70
1000	820	596	70
1000	820	596	70
1000	820	595	70
1000	820	596	70
1000	820	594	70
1000	1000	721	68
1000	820	595	70
1000	820	596	70
1000	820	596	70
1000	820	595	70
1000	820	596	70
1000	820	596	70
1000	1000	676	68
1000	820	558	70
1000	820	557	70
1000	820	557	70
1000	820	557	70
1000	820	556	70
1000	820	557	70
1000	820	567	70
1000	820	567	70
1000	820	567	70
1000	820	567	70
1000	820	569	70
1000	820	567	70
1000	1000	690	68
1000	1000	852	70
1000	1000	693	68
1000	820	573	70
1000	820	570	70
1000	820	570	70
1000	820	570	70
1000	820	572	70
1000	820	572	70
1000	1000	696	68
1000	820	571	70
1000	820	570	70
1000	820	570	70
1000	820	569	70
1000	820	571	70
1000	820	573	70
1000	1000	727	68
1000	820	597	70
1000	820	594	70
1000	820	594	70
1000	820	594	70
1000	820	595	70
1000	820	597	70
1000	1000	725	70
1000	1000	725	68
1000	820	596	70
1000	820	594	70
1000	820	594	70
1000	820	593	70
1000	820	593	70
1000	820	594	70
1000	1000	711	68
1000	820	586	70
1000	820	583	70
1000	820	583	70
1000	820	581	70
1000	820	584	70
1000	820	584	70
1000	1000	664	68
1000	1000	664	68
1000	820	550	70
1000	820	549	70
1000	820	549	70
1000	820	549	70
1000	820	547	70
1000	820	550	70
1000	820	551	70
1000	820	549	70
1000	1000	745	68
1000	1000	745	68
1000	820	617	70
1000	820	617	70
1000	820	617	70
1000	820	617	70
1000	820	617	70
1000	820	619	70
1000	820	619	70
1000	1000	720	68
1000	820	595	70
1000	820	595	70
1000	820	596	70
1000	820	597	70
1000	820	598	70
1000	820	596	70
1000	1000	713	68
1000	820	589	68
1000	1000	589	68
1000	820	589	70
1000	1000	713	68
1000	820	589	70
1000	820	592	70
1000	820	589	70
1000	820	590	70
1000	820	591	70
1000	820	591	70
1000	1000	653	68
1000	820	540	70
1000	820	541	70
1000	820	542	70
1000	820	541	70
1000	820	540	70
1000	810	541	70
1000	1000	663	68
1000	820	547	70
1000	1000	663	70
1000	1000	663	70
1000	820	547	70
1000	820	548	70
1000	1000	548	68
1000	820	547	70
1000	820	548	70
900	1000	507	70
900	820	420	70
900	820	418	70
900	820	418	70
900	820	417	70
900	820	417	70
900	820	414	70
900	1000	571	70
900	820	471	70
900	820	471	70
900	820	471	70
900	820	471	70
900	820	469	70
900	820	473	70
1000	1000	727	68
1000	820	598	70
1000	820	600	70
1000	820	601	70
1000	820	600	70
1000	820	600	70
1000	820	601	70
1000	1000	725	68
1000	820	600	70
1000	820	600	70
1000	820	601	70
1000	820	601	70
1000	820	601	70
1000	820	601	70
1000	1000	717	68
1000	820	591	70
1000	820	591	70
1000	820	592	70
1000	820	591	70
1000	820	592	70
1000	820	592	70
1000	1000	716	68
1000	820	590	70
1000	820	591	70
1000	820	592	70
1000	820	591	70
1000	820	592	70
1000	820	592	70
1000	1000	653	68
1000	820	540	70
1000	820	542	70
1000	820	540	70
1000	820	540	70
1000	820	541	70
1000	820	541	70
1000	1000	742	68
1000	820	613	70
1000	820	614	70
1000	820	612	70
1000	820	612	70
1000	820	613	70
1000	820	613	70
1000	1000	743	68
1000	820	611	70
1000	820	612	70
1000	820	610	70
1000	820	611	70
1000	820	611	70
1000	820	612	70
1000	1000	743	68
1000	820	612	70
1000	820	612	70
1000	820	612	70
1000	820	612	70
1000	820	612	70
1000	820	610	70
1000	1000	726	68
1000	820	599	70
1000	820	599	70
1000	820	599	70
1000	820	597	70
1000	820	596	70
1000	820	585	70
1000	1000	726	68
1000	820	601	70
1000	820	600	70
1000	820	601	70
1000	820	599	70
1000	820	600	70
1000	820	600	70
1000	1000	725	68
1000	820	599	70
1000	820	597	70
1000	820	599	70
1000	820	598	70
1000	820	598	70
1000	820	598	70
1000	1000	739	68
1000	820	611	70
1000	820	611	70
1000	820	611	70
1000	820	610	70
1000	820	611	70
1000	820	612	70
1000	1000	744	68
1000	820	614	70
1000	820	612	70
1000	820	614	70
1000	820	612	70
1000	840	612	70
1000	820	612	70
1000	1000	743	68
1000	820	614	70
1000	820	614	70
1000	820	615	70
1000	820	615	70
1000	820	614	70
1000	820	613	70
1000	1000	755	68
1000	820	623	70
1000	820	623	70
1000	820	623	70
1000	820	621	70
1000	820	621	70
1000	820	612	70
1000	1000	739	70
1000	820	609	70
1000	820	609	70
1000	820	609	70
1000	820	609	70
1000	820	609	70
1000	820	608	70
1000	820	622	70
1000	820	623	70
1000	820	621	70
1000	820	623	70
1000	820	623	70
1000	820	623	70
1000	1000	752	70
1000	1000	765	70
1000	820	629	70
1000	820	628	70
1000	820	628	70
1000	820	627	70
1000	820	631	70
1000	820	626	70
1000	1000	736	70
1000	820	607	70
1000	820	608	70
1000	820	608	70
1000	820	607	70
1000	820	608	70
1000	820	607	70
1000	1000	741	70
1000	820	612	70
1000	820	612	70
1000	820	612	70
1000	820	612	70
1000	820	612	70
1000	820	612	70
1000	1000	716	70
1000	820	592	70
1000	820	591	70
1000	820	592	70
1000	820	590	70
1000	820	591	70
1000	820	591	70
1000	1000	736	68
1000	820	608	70
1000	820	607	70
1000	820	606	70
1000	820	606	70
1000	820	607	70
1000	820	607	70
1000	1000	741	68
1000	820	611	70
1000	820	611	70
1000	820	610	70
1000	820	610	70
1000	820	611	70
1000	820	611	70
1000	820	564	70
1000	820	565	70
1000	820	565	70
1000	820	566	70
1000	820	565	70
1000	820	555	70
1000	1000	682	70
1000	0	578	68
1000	1000	700	68
1000	1000	700	68
1000	820	580	70
1000	820	578	70
1000	820	579	70
1000	820	578	70
1000	820	578	70
1000	820	578	70
1000	1000	723	68
1000	820	597	70
1000	820	596	70
1000	820	597	70
1000	820	596	70
1000	820	597	70
1000	820	596	70
1000	1000	678	70
1000	1000	678	68
1000	1000	678	68
1000	820	560	70
1000	820	559	70
1000	820	559	70
1000	820	558	70
1000	820	558	70
1000	820	556	70
1000	1000	718	68
1000	820	592	70
1000	820	592	70
1000	820	592	70
1000	820	592	70
1000	820	588	70
1000	820	592	70
1000	1000	722	68
1000	820	595	70
1000	820	594	70
1000	820	595	70
1000	820	594	70
1000	820	556	70
1000	820	555	70
1000	1000	672	68
1000	820	555	70
1000	820	553	70
1000	820	555	70
1000	820	555	70
1000	820	593	70
1000	820	594	70
1000	1000	734	68
1000	820	605	70
1000	820	605	70
1000	820	605	70
1000	820	605	70
1000	820	605	70
1000	820	604	70
1000	1000	744	68
1000	820	613	70
1000	820	612	70
1000	820	612	70
1000	820	612	70
1000	820	606	70
1000	820	606	70
1000	1000	734	68
1000	820	605	70
1000	820	605	70
1000	820	605	70
1000	820	605	70
1000	820	523	70
1000	820	521	70
1000	1000	633	68
1000	820	523	70
1000	820	522	70
1000	820	522	70
1000	820	522	70
1000	820	612	70
1000	820	612	70
1000	1000	735	68
1000	820	603	70
1000	820	605	70
1000	820	606	70
1000	820	605	70
1000	820	605	70
1000	820	605	70
1000	1000	734	68
1000	820	605	70
1000	820	605	70
1000	820	605	70
1000	820	605	70
1000	820	605	70
1000	820	605	70
1000	1000	737	68
1000	820	608	70
1000	820	608	70
1000	820	608	70
1000	820	608	70
1000	820	608	70
1000	820	607	70
1000	1000	662	68
1000	820	545	70
1000	820	545	70
1000	820	545	70
1000	820	545	70
1000	820	545	70
1000	820	545	70
1000	1000	729	68
1000	820	601	70
1000	820	598	70
1000	810	598	70
1000	820	598	70
1000	820	594	70
1000	820	598	70
1000	1000	730	70
1000	1000	730	68
1000	820	600	70
1000	820	601	70
1000	820	601	70
1000	820	600	70
1000	820	599	70
1000	820	599	70
1000	1000	727	68
1000	820	598	70
1000	820	599	70
1000	820	599	70
1000	820	599	70
1000	820	590	70
1000	820	599	70
1000	1000	721	68
1000	810	594	70
1000	820	594	70
1000	820	594	70
1000	820	542	70
1000	820	595	70
1000	820	543	70
1000	820	594	70
1000	1000	659	68
1000	820	543	70
1000	820	603	70
1000	820	603	70
1000	820	543	70
1000	820	542	70
1000	820	542	70
1000	1000	712	68
1000	820	587	70
1000	820	587	70
1000	820	587	70
1000	820	587	70
1000	820	587	70
1000	820	602	70
1000	1000	715	68
1000	820	588	70
1000	820	589	70
1000	820	588	70
1000	820	588	70
1000	820	589	70
1000	820	589	70
1000	820	601	70
1000	820	604	70
1000	810	605	70
1000	820	603	70
1000	820	602	70
1000	820	601	70
1000	1000	731	68
1000	1000	716	68
1000	820	589	70
1000	820	589	70
1000	820	589	70
1000	820	589	70
1000	820	589	70
1000	820	589	70
1000	1000	719	68
1000	820	591	70
1000	820	592	70
1000	820	591	70
1000	820	590	70
1000	820	590	70
1000	820	591	70
1000	1000	734	68
1000	820	604	70
1000	820	601	70
1000	820	594	70
1000	820	587	70
1000	820	595	70
1000	820	604	70
1000	1000	712	68
1000	1000	712	68
1000	820	587	70
1000	820	587	70
1000	820	587	70
1000	820	587	70
1000	820	587	70
1000	820	583	70
1000	1000	716	68
1000	820	589	70
1000	820	589	70
1000	820	590	70
1000	820	588	70
1000	820	589	70
1000	820	590	70
1000	1000	724	68
1000	820	596	70
1000	820	596	70
1000	820	596	70
1000	820	596	70
1000	820	596	70
1000	820	596	70
1000	1000	716	68
1000	820	600	70
1000	820	600	70
1000	820	600	70
1000	820	600	70
1000	820	600	70
1000	820	548	70
1000	810	544	70
1000	1000	681	68
1000	820	563	70
1000	820	563	70
1000	820	562	70
1000	820	560	70
1000	820	561	70
1000	820	562	70
1000	1000	680	68
1000	1000	680	68
1000	820	562	70
1000	820	562	70
1000	820	562	70
1000	820	563	70
1000	820	563	70
1000	820	563	70
1000	820	563	70
1000	820	548	70
1000	820	547	70
1000	820	547	70
1000	820	545	70
1000	820	547	70
1000	1000	663	68
1000	1000	679	68
1000	820	567	70
1000	820	572	70
1000	820	573	70
1000	820	574	70
1000	820	557	70
1000	1000	744	68
1000	820	616	70
1000	820	619	70
1000	820	617	70
1000	820	617	70
1000	820	615	70
1000	820	616	70
1000	1000	721	68
1000	1000	721	68
1000	820	595	70
1000	820	595	70
1000	820	593	70
1000	820	594	70
1000	820	593	70
1000	820	594	70
1000	1000	723	68
1000	820	596	70
1000	820	597	70
1000	820	596	70
1000	820	595	70
1000	820	595	70
1000	820	589	70
1000	1000	722	68
1000	820	596	70
1000	820	596	70
900	820	420	70
900	820	418	70
900	820	418	70
900	820	417	70
900	820	417	70
900	820	414	70
900	1000	571	70
900	820	471	70
900	820	471	70
900	820	471	70
900	820	471	70
900	820	469	70
900	820	473	70
1000	1000	727	68
1000	820	598	70
1000	820	600	70
1000	820	601	70
1000	820	600	70
1000	820	600	70
1000	820	601	70
1000	1000	725	68
1000	820	600	70
1000	820	600	70
1000	820	601	70
1000	820	601	70
1000	820	601	70
1000	820	601	70
1000	1000	717	68
1000	820	591	70
1000	820	591	70
1000	820	592	70
1000	820	591	70
1000	820	592	70
1000	820	592	70
1000	1000	716	68
1000	820	590	70
1000	820	591	70
1000	820	592	70
1000	820	591	70
1000	820	592	70
1000	820	592	70
1000	1000	653	68
1000	820	540	70
1000	820	542	70
1000	820	540	70
1000	820	540	70
1000	820	541	70
1000	820	541	70
1000	1000	742	68
1000	820	613	70
1000	820	614	70
1000	820	612	70
1000	820	612	70
1000	820	613	70
1000	820	613	70
1000	1000	743	68
1000	820	611	70
1000	820	612	70
1000	820	610	70
1000	820	611	70
1000	820	611	70
1000	820	612	70
1000	1000	743	68
1000	820	612	70
1000	820	612	70
1000	820	612	70
1000	820	612	70
1000	820	612	70
1000	820	610	70
1000	1000	726	68
1000	820	599	70
1000	820	599	70
1000	820	599	70
1000	820	597	70
1000	820	596	70
1000	820	585	70
1000	1000	726	68
1000	820	601	70
1000	820	600	70
1000	820	601	70
1000	820	599	70
1000	820	600	70
1000	820	600	70
1000	1000	725	68
1000	820	599	70
1000	820	597	70
1000	820	599	70
1000	820	598	70
1000	820	598	70
1000	820	598	70
1000	1000	739	68
1000	820	611	70
1000	820	611	70
1000	820	611	70
1000	820	610	70
1000	820	611	70
1000	820	612	70
1000	1000	744	68
1000	820	614	70
1000	820	612	70
1000	820	614	70
1000	820	612	70
1000	840	612	70
1000	820	612	70
1000	1000	743	68
1000	820	614	70
1000	820	614	70
1000	820	615	70
1000	820	615	70
1000	820	614	70
1000	820	613	70
1000	1000	755	68
1000	820	623	70
1000	820	623	70
1000	820	623	70
1000	820	621	70
1000	820	621	70
1000	820	612	70
1000	1000	739	70
1000	820	609	70
1000	820	609	70
1000	820	609	70
1000	820	609	70
1000	820	609	70
1000	820	608	70
1000	820	622	70
1000	820	623	70
1000	820	621	70
1000	820	623	70
1000	820	623	70
1000	820	623	70
1000	1000	752	70
1000	1000	765	70
1000	820	629	70
1000	820	628	70
1000	820	628	70
1000	820	627	70
1000	820	631	70
1000	820	626	70
1000	1000	736	70
1000	820	607	70
1000	820	608	70
1000	820	608	70
1000	820	607	70
1000	820	608	70
1000	820	607	70
1000	1000	741	70
1000	820	612	70
1000	820	612	70
1000	820	612	70
1000	820	612	70
1000	820	612	70
1000	820	612	70
1000	1000	716	70
1000	820	592	70
1000	820	591	70
1000	820	592	70
1000	820	590	70
1000	820	591	70
1000	820	591	70
1000	1000	736	68
1000	820	608	70
1000	820	607	70
1000	820	606	70
1000	820	606	70
1000	820	607	70
1000	820	607	70
1000	1000	741	68
1000	820	611	70
1000	820	611	70
1000	820	610	70
1000	820	610	70
1000	820	611	70
1000	820	611	70
1000	820	564	70
1000	820	565	70
1000	820	565	70
1000	820	566	70
1000	820	565	70
1000	820	555	70
1000	1000	682	70
1000	0	578	68
1000	1000	700	68
1000	1000	700	68
1000	820	580	70
1000	820	578	70
1000	820	579	70
1000	820	578	70
1000	820	578	70
1000	820	578	70
1000	1000	723	68
1000	820	597	70
1000	820	596	70
1000	820	597	70
1000	820	596	70
1000	820	597	70
1000	820	596	70
1000	1000	678	70
1000	1000	678	68
1000	1000	678	68
1000	820	560	70
1000	820	559	70
1000	820	559	70
1000	820	558	70
1000	820	558	70
1000	820	556	70
1000	1000	718	68
1000	820	592	70
1000	820	592	70
1000	820	592	70
1000	820	592	70
1000	820	588	70
1000	820	592	70
1000	1000	722	68
1000	820	595	70
1000	820	594	70
1000	820	595	70
1000	820	594	70
1000	820	556	70
1000	820	555	70
1000	1000	672	68
1000	820	555	70
1000	820	553	70
1000	820	555	70
1000	820	555	70
1000	820	593	70
1000	820	594	70
1000	1000	734	68
1000	820	605	70
1000	820	605	70
1000	820	605	70
1000	820	605	70
1000	820	605	70
1000	820	604	70
1000	1000	744	68
1000	820	613	70
1000	820	612	70
1000	820	612	70
1000	820	612	70
1000	820	606	70
1000	820	606	70
1000	1000	734	68
1000	820	605	70
1000	820	605	70
1000	820	605	70
1000	820	605	70
1000	820	523	70
1000	820	521	70
1000	1000	633	68
1000	820	523	70
1000	820	522	70
1000	820	522	70
1000	820	522	70
1000	820	612	70
1000	820	612	70
1000	1000	735	68
1000	820	603	70
1000	820	605	70
1000	820	606	70
1000	820	605	70
1000	820	605	70
1000	820	605	70
1000	1000	734	68
1000	820	605	70
1000	820	605	70
1000	820	605	70
1000	820	605	70
1000	820	605	70
1000	820	605	70
1000	1000	737	68
1000	820	608	70
1000	820	608	70
1000	820	608	70
1000	820	608	70
1000	820	608	70
1000	820	607	70
1000	1000	662	68
1000	820	545	70
1000	820	545	70
1000	820	545	70
1000	820	545	70
1000	820	545	70
1000	820	545	70
1000	1000	729	68
1000	820	601	70
1000	820	598	70
1000	810	598	70
1000	820	598	70
1000	820	594	70
1000	820	598	70
1000	1000	730	70
1000	1000	730	68
1000	820	600	70
1000	820	601	70
1000	820	601	70
1000	820	600	70
1000	820	599	70
1000	820	599	70
1000	1000	727	68
1000	820	598	70
1000	820	599	70
1000	820	599	70
1000	820	599	70
1000	820	590	70
1000	820	599	70
1000	1000	721	68
1000	810	594	70
1000	820	594	70
1000	820	594	70
1000	820	542	70
1000	820	595	70
1000	820	543	70
1000	820	594	70
1000	1000	659	68
1000	820	543	70
1000	820	603	70
1000	820	603	70
1000	820	543	70
1000	820	542	70
1000	820	542	70
1000	1000	712	68
1000	820	587	70
1000	820	587	70
1000	820	587	70
1000	820	587	70
1000	820	587	70
1000	820	602	70
1000	1000	715	68
1000	820	588	70
1000	820	589	70
1000	820	588	70
1000	820	588	70
1000	820	589	70
1000	820	589	70
1000	820	601	70
1000	820	604	70
1000	810	605	70
1000	820	603	70
1000	820	602	70
1000	820	601	70
1000	1000	731	68
1000	1000	716	68
1000	820	589	70
1000	820	589	70
1000	820	589	70
1000	820	589	70
1000	820	589	70
1000	820	589	70
1000	1000	719	68
1000	820	591	70
1000	820	592	70
1000	820	591	70
1000	820	590	70
1000	820	590	70
1000	820	591	70
1000	1000	734	68
1000	820	604	70
1000	820	601	70
1000	820	594	70
1000	820	587	70
1000	820	595	70
1000	820	604	70
1000	1000	712	68
1000	1000	712	68
1000	820	587	70
1000	820	587	70
1000	820	587	70
1000	820	587	70
1000	820	587	70
1000	820	583	70
1000	1000	716	68
1000	820	589	70
1000	820	589	70
1000	820	590	70
1000	820	588	70
1000	820	589	70
1000	820	590	70
1000	1000	724	68
1000	820	596	70
1000	820	596	70
1000	820	596	70
1000	820	596	70
1000	820	596	70
1000	820	596	70
1000	1000	716	68
1000	820	600	70
1000	820	600	70
1000	820	600	70
1000	820	600	70
1000	820	600	70
1100	820	754	70
1100	820	753	70
1100	820	755	70
1100	820	753	70
1100	820	753	70
1100	820	755	70
1000	820	676	70
1000	820	679	70
1000	820	676	70
1000	820	676	70
1000	820	668	70
1000	1000	743	70
1000	820	610	70
1000	820	609	70
1000	820	611	70
1000	820	611	70
1000	820	611	70
1000	820	610	70
1000	820	625	70
1000	820	626	70
1000	820	626	70
1000	820	626	70
1000	820	625	70
1000	820	617	70
1000	1000	759	70
1000	1000	689	70
1000	820	570	70
1000	820	570	70
1000	820	570	70
1000	820	570	70
1000	820	570	70
1000	820	570	70
1000	820	598	70
1000	820	598	70
1000	820	599	70
1000	820	597	70
1000	820	595	70
1000	820	598	70
1000	1000	726	70
1000	1000	727	70
1000	820	598	70
1000	820	598	70
1000	820	598	70
1000	820	601	70
1000	820	595	70
1000	820	598	70
1000	820	599	70
1000	820	601	70
1000	820	601	70
1000	820	604	70
1000	820	600	70
1000	820	600	70
1000	1000	731	70
1000	820	599	70
1000	820	598	70
1000	1000	729	70
1000	820	600	70
1000	820	600	70
1000	820	601	70
1000	820	602	70
950	1000	630	70
950	820	518	70
950	820	516	70
950	820	517	70
950	820	518	70
950	820	514	70
950	820	600	70
1000	820	600	70
1000	820	516	70
1000	820	516	70
1000	820	598	70
1000	820	598	70
1000	820	602	70
1000	820	599	70
1000	820	601	70
1000	1000	715	70
1000	820	598	70
1000	1000	598	70
1000	1000	735	70
1000	820	603	70
1000	820	603	70
1000	1000	740	70
1000	820	601	70
1000	820	603	70
1000	860	603	70
1000	820	603	70
1000	820	602	70
1000	820	602	70
1000	1000	734	70
1000	820	603	70
1000	820	601	70
1000	820	604	70
1000	820	601	70
1000	820	602	70
1000	820	602	70
1100	1000	920	70
1000	1000	764	70
1000	820	629	70
1000	820	628	70
1000	820	629	70
1000	820	627	70
1000	820	626	70
1000	820	625	70
1000	820	626	70
1000	820	628	70
1000	820	625	70
1000	820	627	70
1000	820	624	70
1000	820	620	70
1000	1000	764	70
1000	1000	697	70
1000	820	574	70
1000	820	574	70
1000	820	573	70
1000	820	574	70
1000	820	572	70
1000	820	571	70
950	820	524	70
950	820	526	70
950	820	526	70
950	820	528	70
950	820	523	70
950	820	517	70
950	1000	640	70
1000	1000	748	70
1000	820	617	70
1000	820	615	70
1000	820	615	70
1000	820	615	70
1000	820	613	70
1000	820	610	70
1000	1000	747	70
1000	820	614	70
1000	820	613	70
1000	820	615	70
1000	820	615	70
1000	820	616	70
1000	820	615	70
1100	1000	889	70
1100	820	733	70
1100	820	731	70
1100	820	731	70
1100	820	729	70
1100	820	731	70
1100	820	724	70
1000	1000	787	70
1000	820	648	70
1000	820	646	70
1000	820	647	70
1000	820	648	70
1000	860	648	70
1000	820	645	70
1000	820	629	70
1000	820	629	70
1000	820	627	70
1000	1000	762	70
1000	820	607	70
1000	1000	745	70
1000	1000	745	70
1000	820	612	70
1000	820	612	70
1000	820	613	70
1000	820	613	70
1000	820	611	70
1000	820	599	70
900	820	503	70
900	820	503	70
900	820	502	70
900	820	501	70
900	820	497	70
900	820	504	70
900	1000	612	70
950	1000	669	70
950	820	548	70
950	820	547	70
950	820	550	70
950	820	550	70
950	820	552	70
950	820	550	70
1000	1000	740	70
1000	820	609	70
1000	820	611	70
1000	820	609	70
1000	820	609	70
1000	820	609	70
1000	820	601	70
1000	1000	773	70
1000	820	636	70
1000	820	635	70
1000	820	637	70
1000	820	637	70
1000	820	639	70
1000	820	637	70
1000	820	638	70
1000	820	636	70
1000	820	638	70
1000	1000	775	70
1000	820	639	70
1000	820	640	70
1000	820	639	70
1000	1000	770	70
1000	820	633	70
1000	820	635	70
1000	820	633	70
1000	820	633	70
1000	820	632	70
1000	820	614	70
1000	1000	772	70
1000	820	634	70
1000	820	636	70
1000	820	636	70
1000	820	637	70
1000	820	634	70
1000	820	630	70
1000	1000	745	70
1000	1000	745	70
1000	820	612	70
1000	820	610	70
1000	820	612	70
1000	820	612	70
1000	820	611	70
1000	820	610	70
1000	820	605	70
1000	820	596	70
1000	820	607	70
1000	820	607	70
1000	820	603	70
1000	820	603	70
1000	820	595	70
1000	1000	728	70
1000	1000	768	70
1000	820	631	70
1000	820	629	70
1000	820	633	70
1000	820	632	70
1000	820	633	70
1000	820	629	70
1000	820	604	70
1000	820	606	70
1000	820	606	70
1000	820	606	70
1000	820	605	70
1000	820	606	70
1000	820	606	70
1000	820	596	70
1000	1000	735	70
1000	1000	737	70
1000	820	605	70
1000	820	603	70
1000	820	606	70
1000	820	606	70
1000	820	604	70
1000	820	605	70
1000	820	587	70
1000	820	570	70
1000	820	573	70
1000	820	584	70
1000	820	584	70
1000	820	566	70
1000	1000	718	70
1000	820	590	70
1000	820	588	70
1000	820	590	70
1000	1000	719	70
1000	820	590	70
1000	820	590	70
1000	820	590	70
1000	820	591	70
1000	820	591	70
1000	820	592	70
1000	820	592	70
1000	820	590	70
1000	820	590	70
1000	1000	720	70
1000	820	592	70
1000	820	592	70
1000	820	593	70
1000	820	594	70
1000	820	590	70
1000	820	591	70
1000	1000	720	70
1000	820	592	70
1000	820	592	70
1000	820	593	70
1000	820	591	70
1000	820	580	70
1000	820	592	70
1000	1000	727	70
1000	820	597	70
1000	820	595	70
1000	820	598	70
1000	820	598	70
1000	820	598	70
1000	820	597	70
1000	1000	742	70
1000	820	610	70
1000	820	609	70
1000	820	610	70
1000	820	612	70
1000	820	609	70
1000	820	598	70
1000	1000	745	70
1000	820	612	70
1000	820	610	70
1000	820	613	70
1000	820	613	70
1000	820	613	70
1000	820	614	70
1000	1000	739	70
1000	820	611	70
1000	820	609	70
1000	820	594	70
1000	820	601	70
1100	1000	915	70
1100	820	750	70
1100	820	752	70
1100	820	753	70
1100	820	750	70
1100	820	755	70
1100	820	737	70
1100	1000	921	70
1100	820	759	70
1100	820	758	70
1100	820	759	70
1100	820	761	70
1100	820	754	70
1100	820	744	70
1100	1000	921	70
1100	820	756	70
1100	820	754	70
1100	820	758	70
1100	820	758	70
1100	820	754	70
1100	820	760	70
1100	820	776	70
1100	820	774	70
1100	820	777	70
1100	820	775	70
1100	820	775	70
1100	820	754	70
1100	1000	942	70
1000	820	622	70
1000	820	622	70
1000	820	624	70
1000	820	624	70
1000	820	622	70
1000	820	626	70
1000	820	616	70
1000	1000	757	70
1000	1000	764	70
1000	820	628	70
1000	820	626	70
1000	820	629	70
1000	820	628	70
1000	820	626	70
1000	820	630	70
1000	820	623	70
1000	820	623	70
1000	820	626	70
1000	820	625	70
1000	820	624	70
1000	820	628	70
1000	1000	760	70
1000	1000	762	70
1000	820	625	70
1000	820	628	70
1000	820	628	70
1000	820	630	70
1000	820	625	70
1000	820	627	70
1000	1000	669	70
1000	820	549	70
1000	820	548	70
1000	820	550	70
1000	820	550	70
1000	820	550	70
1000	820	548	70
1000	820	676	70
1000	820	679	70
1000	820	678	70
1000	820	678	70
1000	820	681	70
1000	820	671	70
1000	1000	817	70
1000	1000	822	70
1000	1000	765	70
1000	820	628	70
1000	820	628	70
1000	820	626	70
1000	820	561	70
1000	820	561	70
1000	820	628	70
1000	820	625	70
1000	820	628	70
1000	1000	683	70
1000	820	561	70
1000	820	564	70
1000	820	564	70
1000	820	566	70
1000	1000	678	70
1000	820	558	70
1000	820	556	70
1000	820	564	70
1000	820	556	70
1000	820	551	70
1000	820	559	70
850	820	390	70
850	820	393	70
850	820	388	70
850	820	390	70
850	820	387	70
850	820	389	70
850	1000	480	70
1000	1000	750	70
1000	820	611	70
1000	820	610	70
1000	820	610	70
1000	820	615	70
1000	820	612	70
1000	820	611	70
1000	1000	751	70
1000	820	610	70
1000	820	610	70
1000	820	613	70
1000	820	609	70
1000	820	611	70
1000	820	616	70
1000	820	609	70
1000	1000	751	70
1000	820	610	70
1000	820	613	70
1000	820	611	70
1000	820	615	70
[truncated: 7,590 more rows]
